# Supplementary material for: Second Generation Small Molecule Inhibitors of Gankyrin for the Treatment of Pediatric Liver Cancer
Source: MDPI journal article supplement (doi:10.3390/cancers14133068), 2022-06-22

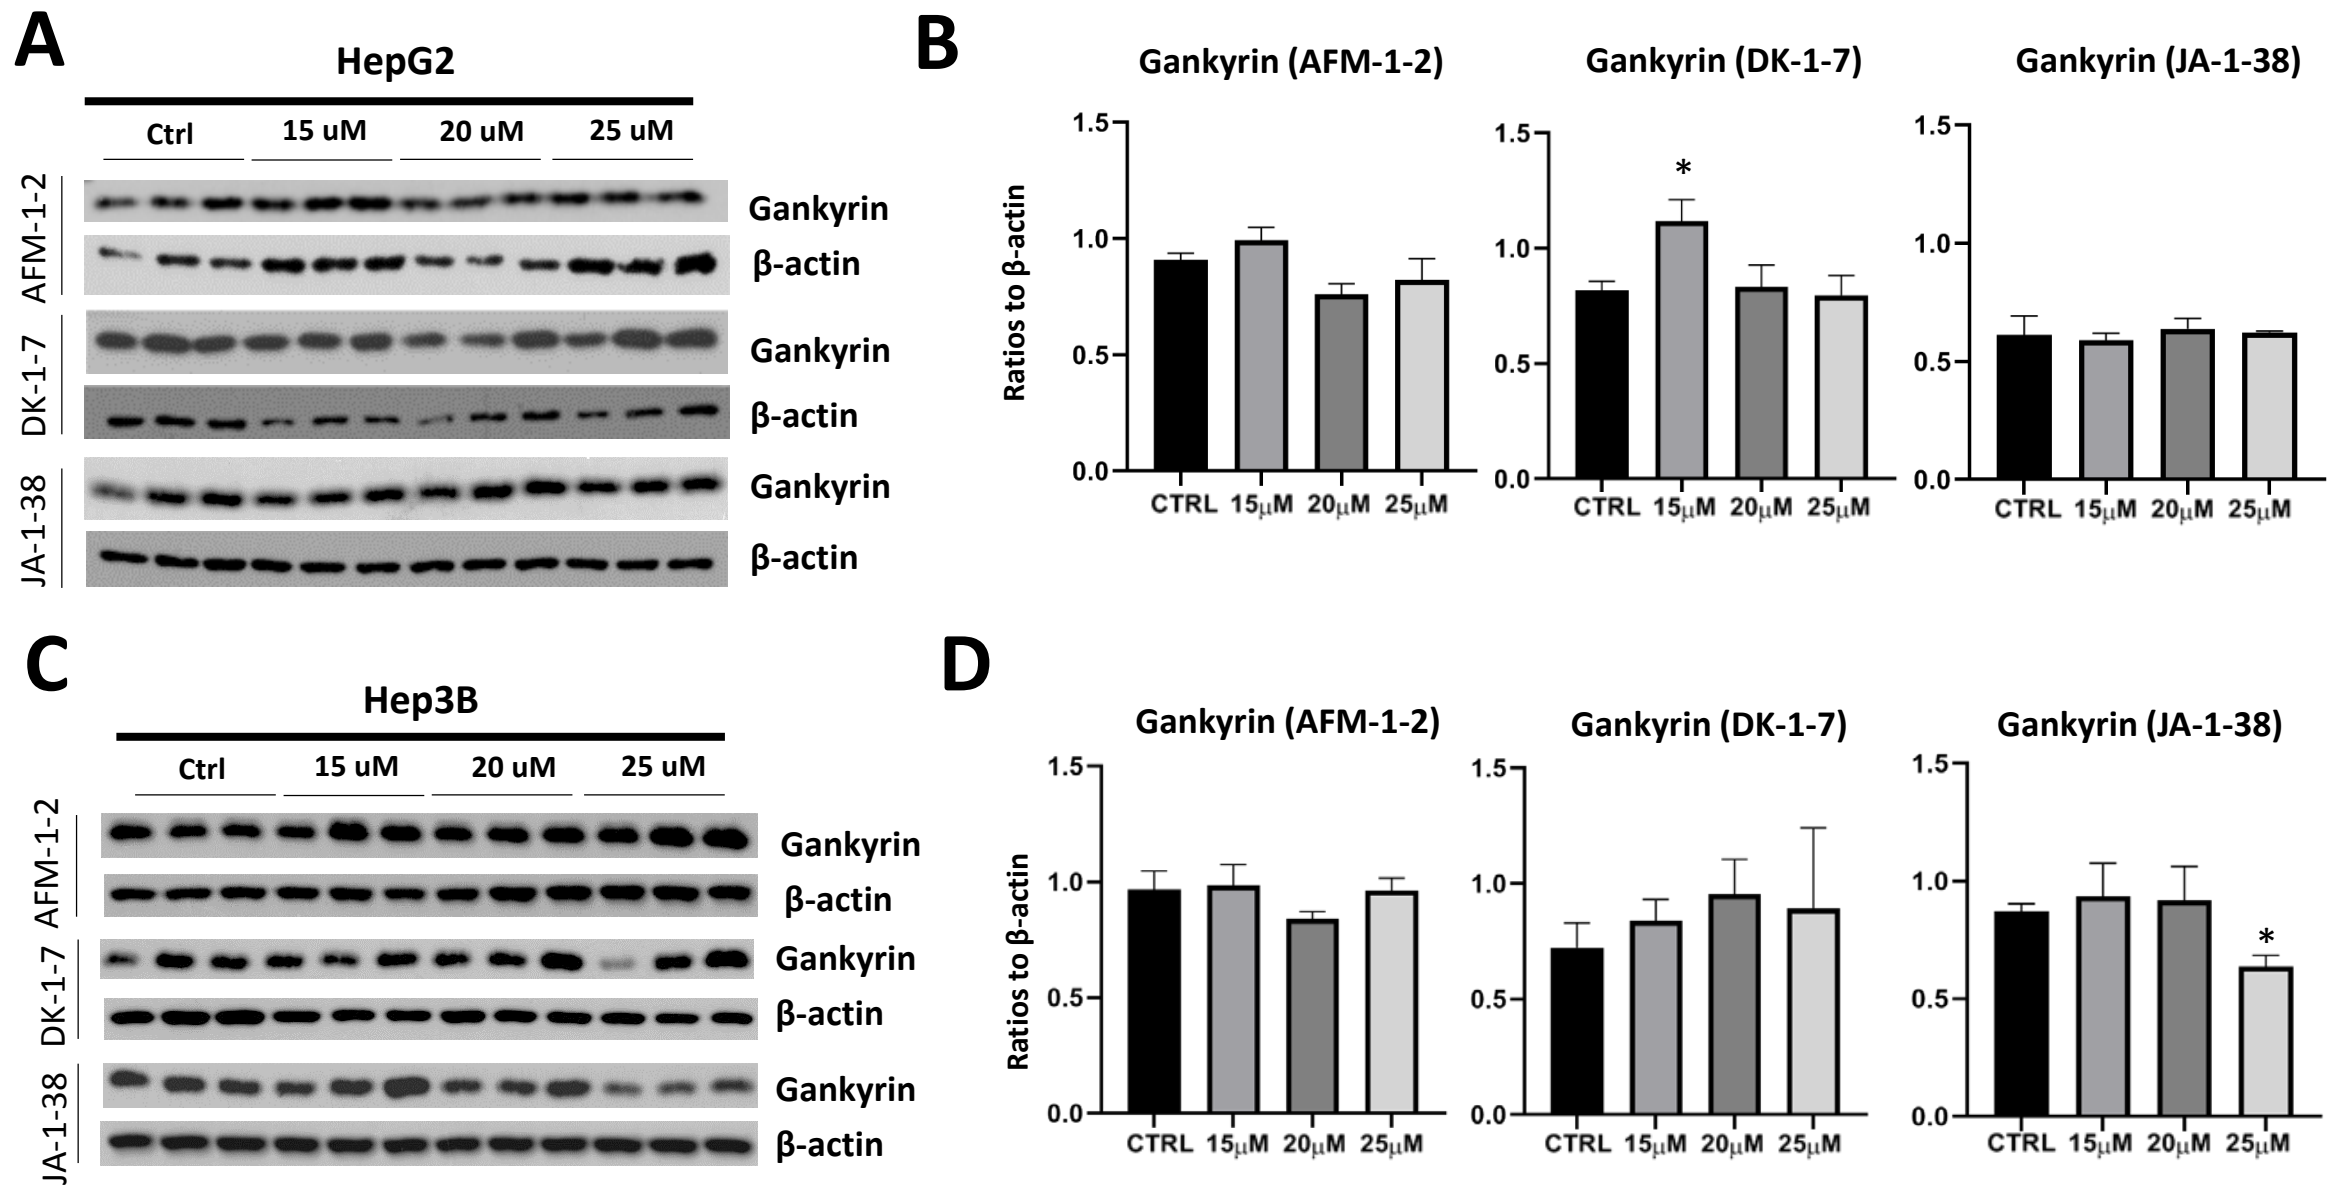

**Figure S1.** A. Western blot of Gankyrin expression in HepG2 cells treated with all three compounds. B. Quantitation of western blots of from Supplemental Figure S1A. C. Western blot of Gankyrin expression in Hep3B cells treated with all three compounds. D. Quantitation of western blots from Supplemental Figure S1C.

**A**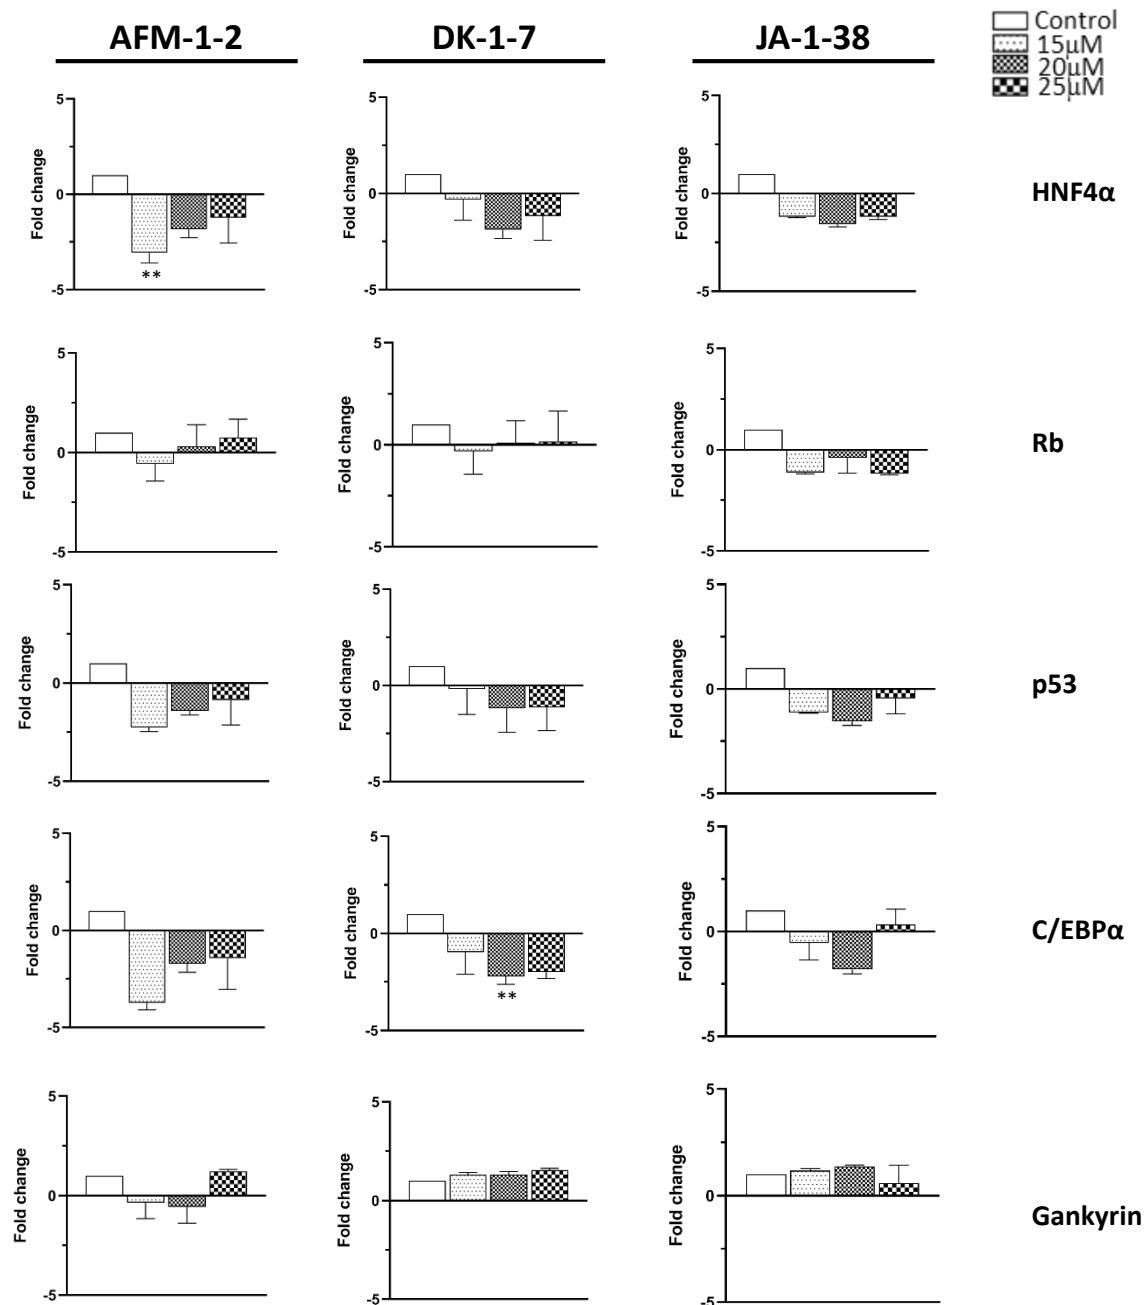**B**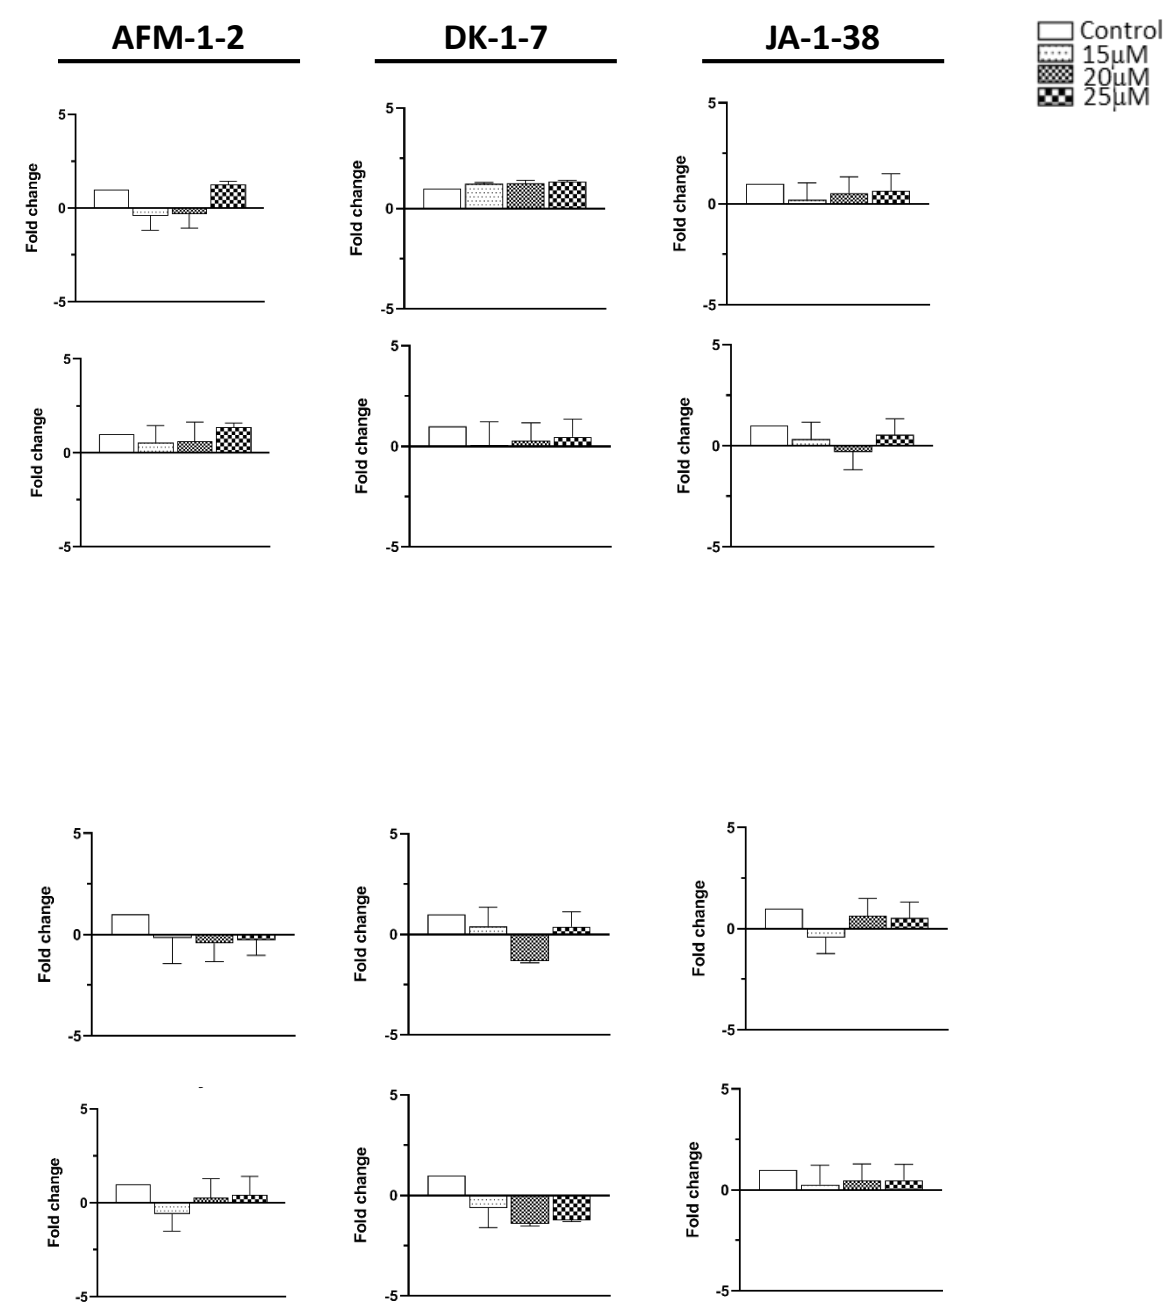

**Figure S2.** A. QRT-PCR results of HepG2 cells treated with AFM-1-2, DK-1-7, and JA-1-38. . In AFM-1 and -2, there was a statistically significant decrease in HNF4α at 15 μM ( $p = 0.002$ ), and in DK-1–7, there was a statistically significant decrease in c/EBPα at 20 μM ( $p = 0.003$ ). B. QRT-PCR results of Hep3B cells treated with AFM-1-2, DK-1-7, and JA-1-38.



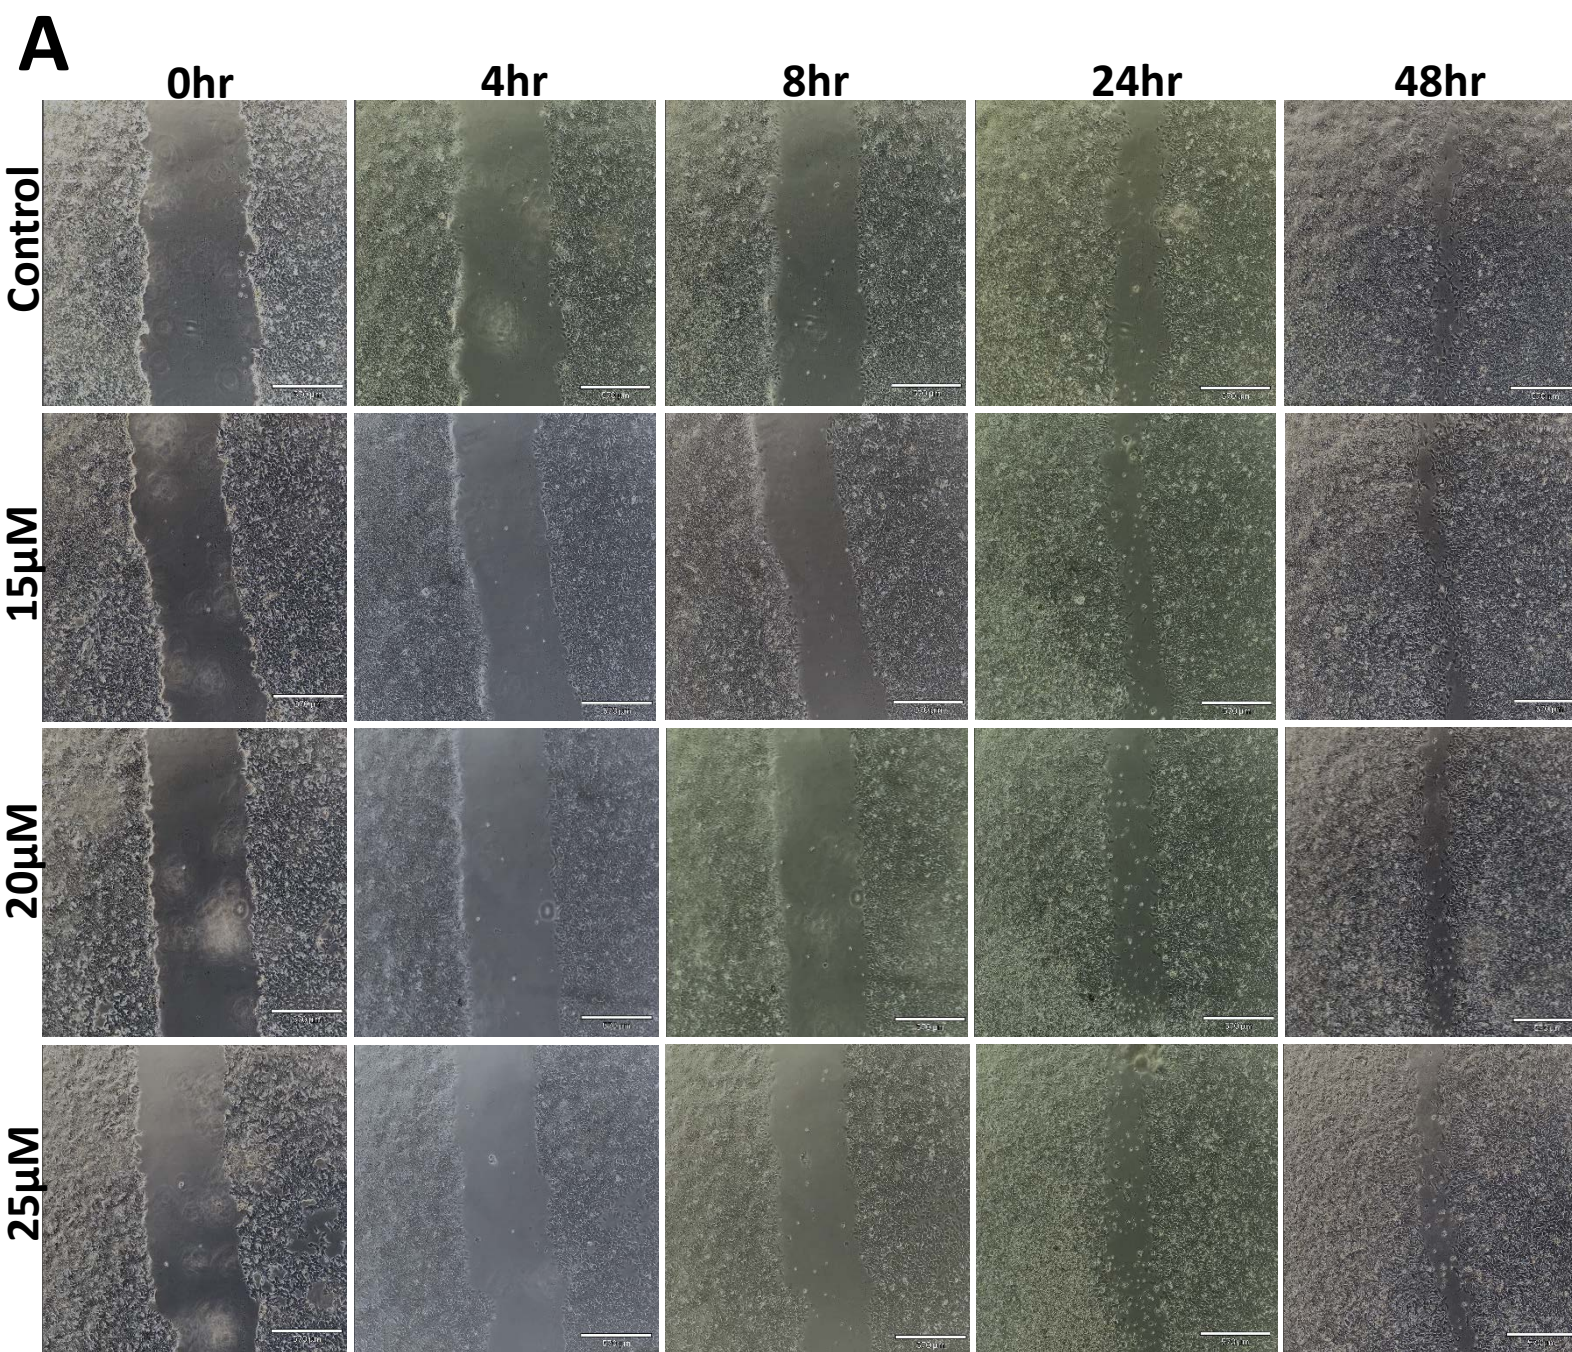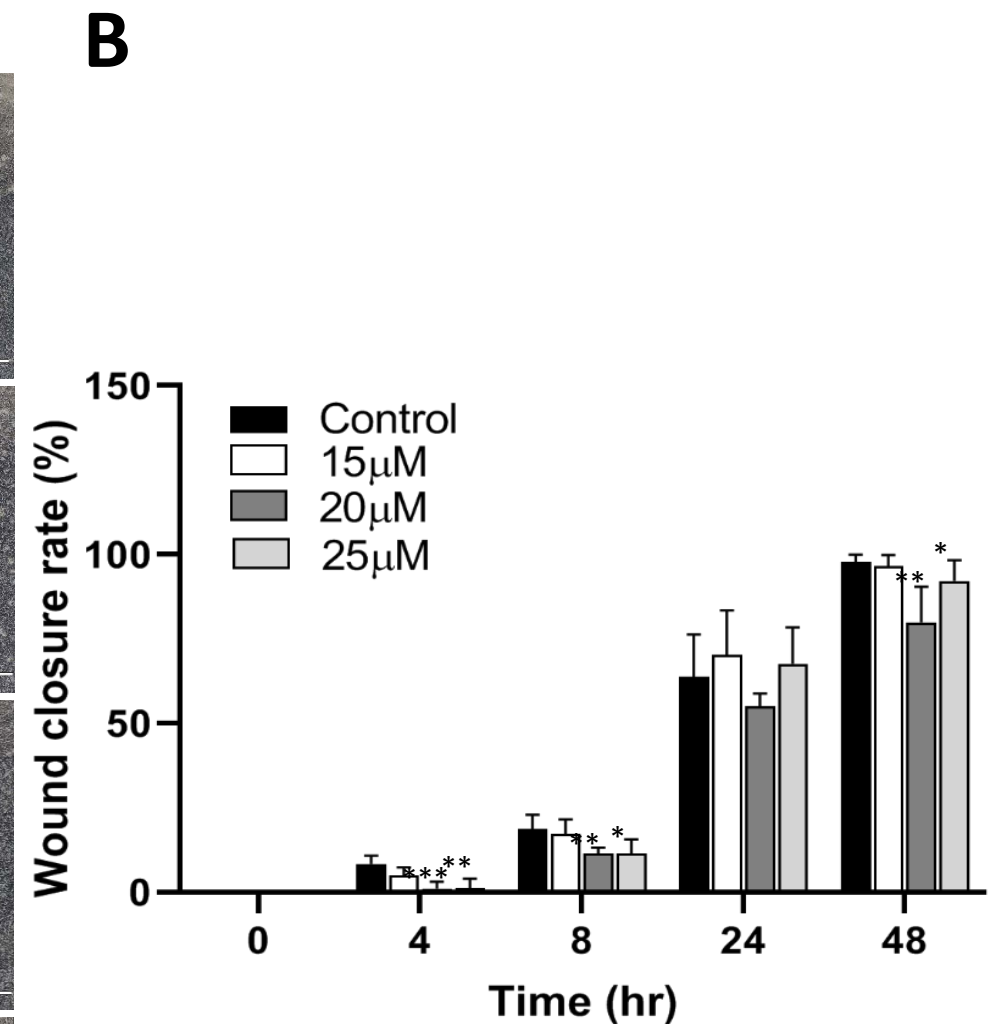

**Figure S3.** A. Representative image showing wound healing in Hep3B cell line after treatment with increasing concentrations of AFM-1-2. B. Bar graph showing wound healing rate (percentage) at the indicated time points in response to treatment with AFM-1-2. Ruler on each image represents 570 micrometer. At 4 hours, a difference in wound healing was seen at 20 uM ( $p=0.005$ ) and 25 uM ( $p=0.0017$ ). A similar difference was seen in these two concentrations at 8 hours (20 uM,  $p=0.0044$ ; 25 uM,  $p=0.0288$ ). There was a trend to decrease in migration for 20 uM at 24 hours but no statistically significant change was seen. However, at 48 hours, there was a difference at both 20 uM ( $p=0.0035$ ) and 25 uM ( $p=0.0125$ ) dosing.

| Primer name | Sequence (5' to 3')      |
|-------------|--------------------------|
| HPRT-F      | TGACACTGGCAAAACAATGCA    |
| HPRT-R      | GGTCCTTTTCACCAGCAAGCT    |
| PSMD10-F    | GGGTGTGTGTCTAACCTAATGG   |
| PSMD10-R    | GGCCAGAATACTCTCCTTCAACT  |
| RB1-F       | TTGGATCACAGCGATACAAACTT  |
| RB1-R       | AGCGCACGCCAATAAAGACAT    |
| CUGBP1-F    | CTGAAAAGGACTTGCGGGAAC    |
| CUGBP1-R    | GGCGGGTTTTGGCTCCTAT      |
| HNf4a-F     | CGAAGGTCAAGCTATGAGGACA   |
| HNf4a-R     | ATCTGCGATGCTGGCAATCT     |
| C/EBPα-F    | AGGAGGATGAAGCCAAGCAGCT   |
| C/EBPα-R    | AGTGCGCGATCTGGAAGTGCAG   |
| cdc2-F      | GGATGTGCTTATGCAGGATTCC   |
| cdc2-R      | CATGTACTGACCAGGAGGGATAG  |
| Epcam-F     | TGATCCTGACTGCGATGAGAG    |
| Epcam-R     | CTTGTCTGTTCTTCTGACCCC    |
| Thy1-F      | CCTTCAGCACCTAAGTCCATAC   |
| Thy1-R      | GTGGACAATCCAGTCCAGAAA    |
| CD13-F      | GTTCTCCTTCTCCAACCTCATC   |
| CD13-R      | CTGTTTCCTCGTTGCTTCT      |
| KRT19-F     | AACGGCGAGCTAGAGGTGA      |
| KRT19-R     | GGATGGTCGTGTAGTAGTGGC    |
| CD133-F     | AGTCGGAAACTGGCAGATAGC    |
| CD133-R     | GGTAGTGTTGTACTGGGCCAAT   |
| P53-F       | TCAACAAGATGTTTTGCCAACTG  |
| P53-R       | ATGTGCTGTGACTGCTTGTAGATG |
| Oct4-F      | GGGAGATTGATAACTGGTGTGTT  |
| Oct4-R      | GTGTATATCCCAGGGTGATCCTC  |
| CD44-F      | CTGCCGCTTTGCAGGTGTA      |
| CD44-R      | CATTGTGGGCAAGGTGCTATT    |

**Figure S4**



CUGBP1

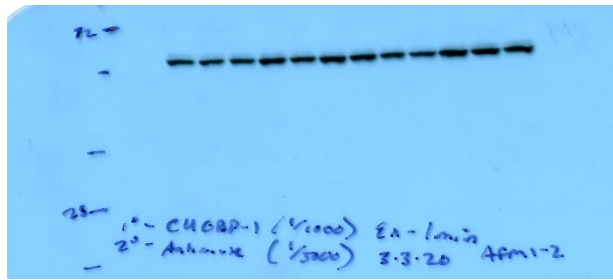

$\beta$ -actin

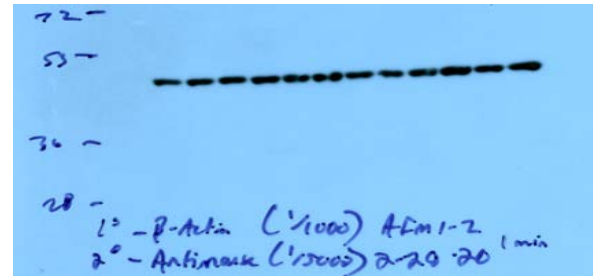

Rb

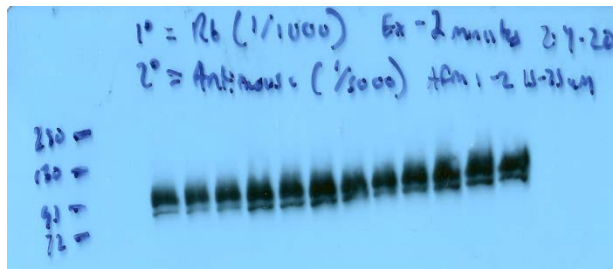

p53

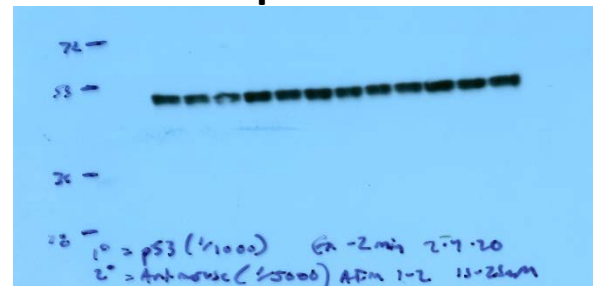

$\beta$ -actin

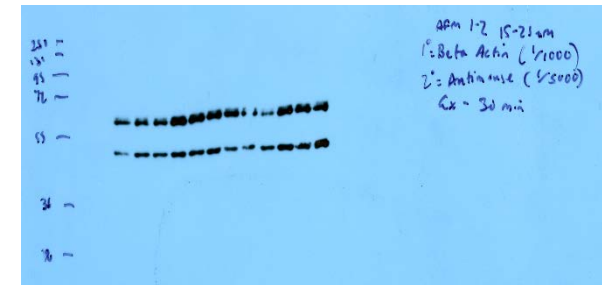

Ph-Rb

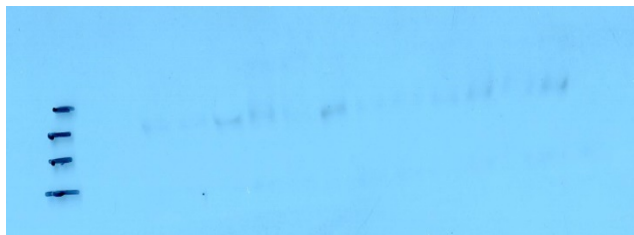

cdc2

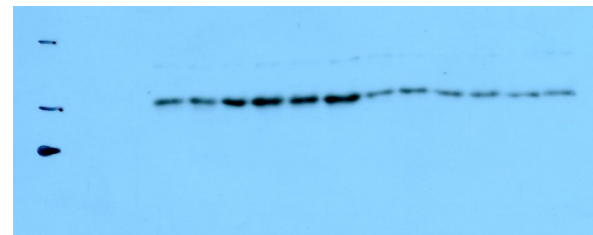

$\beta$ -actin

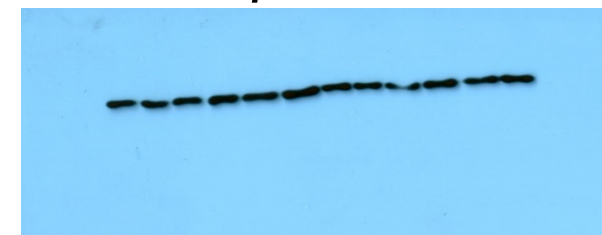

### CUGBP1

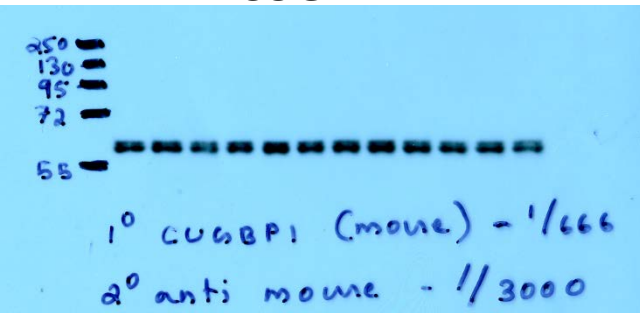

### $\beta$ -actin

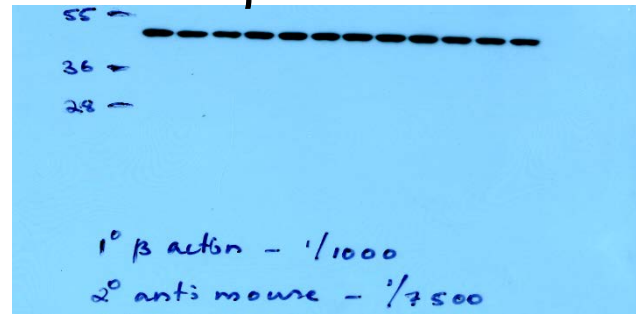

### HNF4 $\alpha$

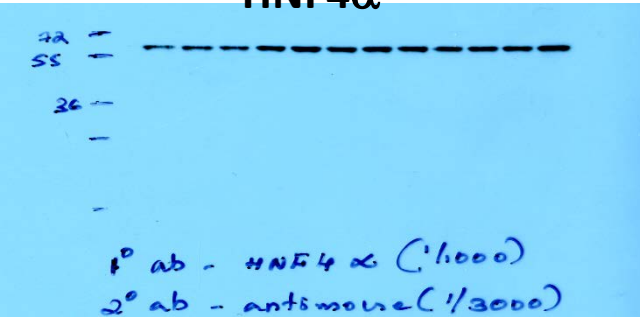

### Rb

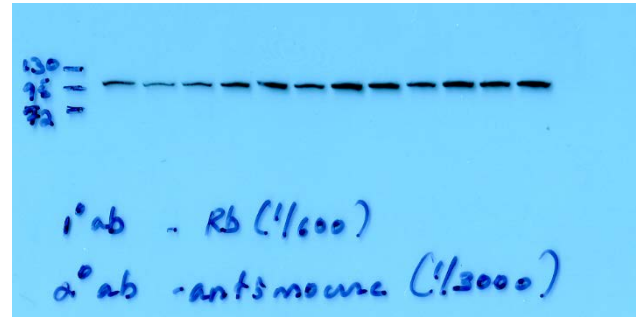

### cdc2

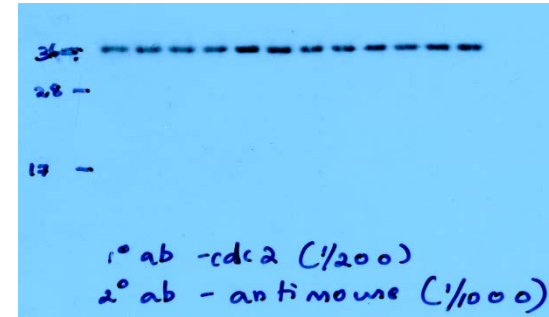

### $\beta$ -actin

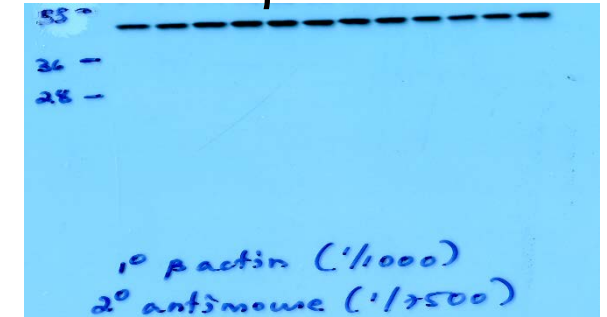

### Ph-Rb

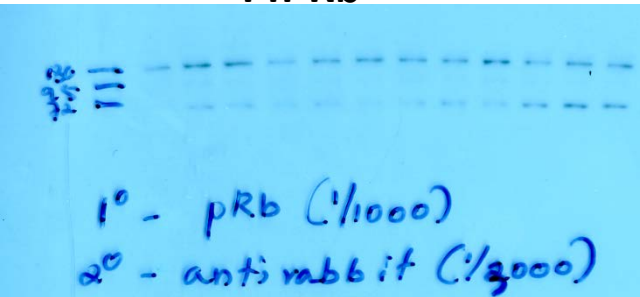

### $\beta$ -actin

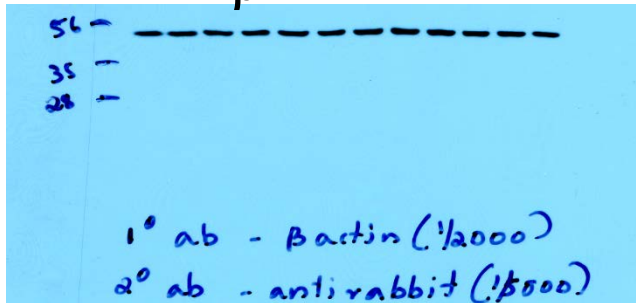

CUGBP1

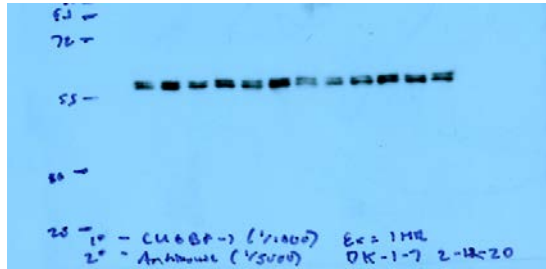

p53

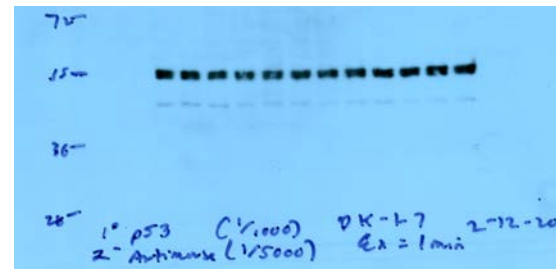

Rb

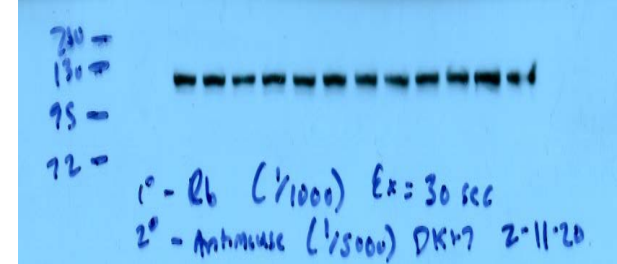

HNF4 $\alpha$

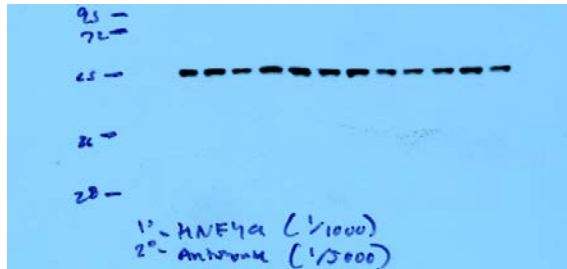

$\beta$ -actin

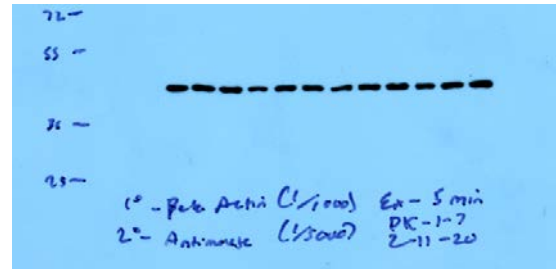

Ph-Rb

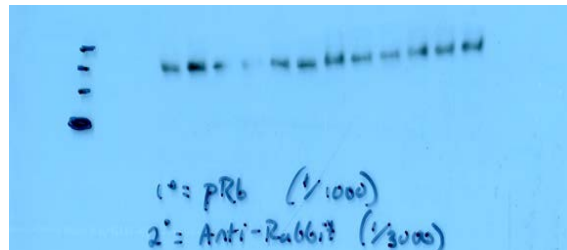

cdc2

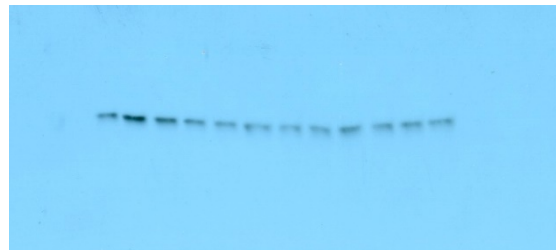

$\beta$ -actin

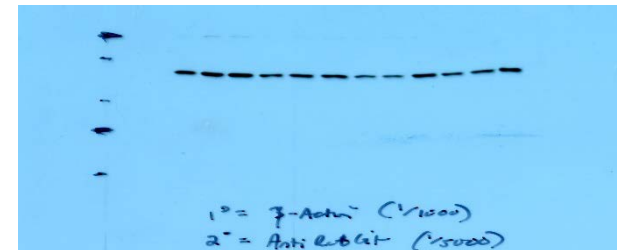

### CUGBP1

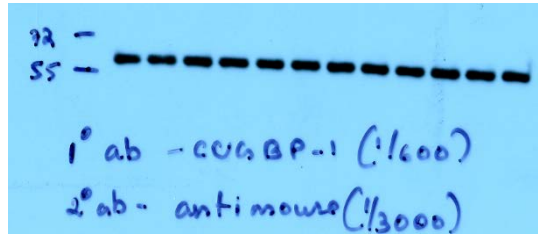

### Rb

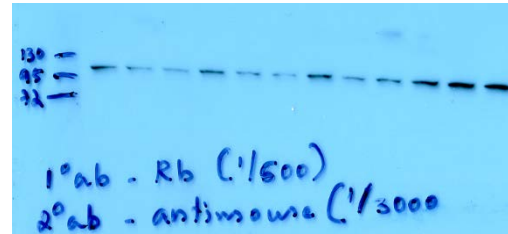

### cdc2

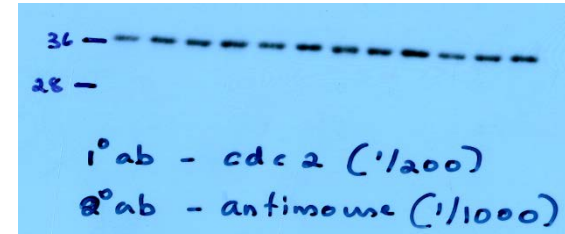

### β-actin

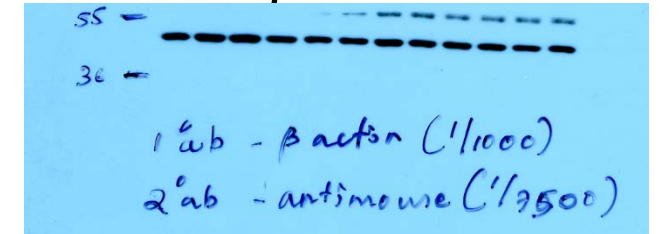

### HNF4α

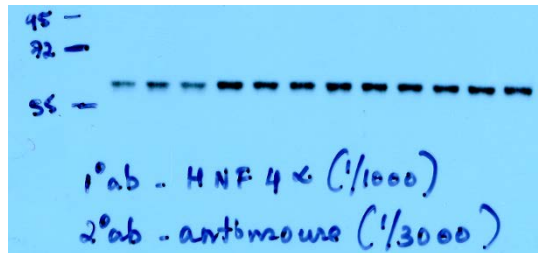

### β-actin

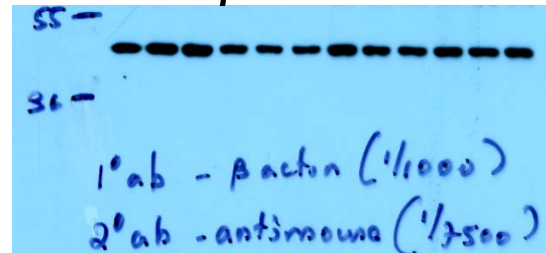

### Ph-Rb

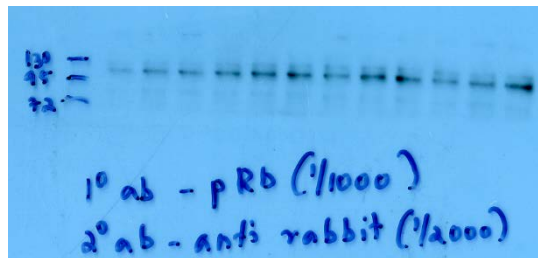

### β-actin

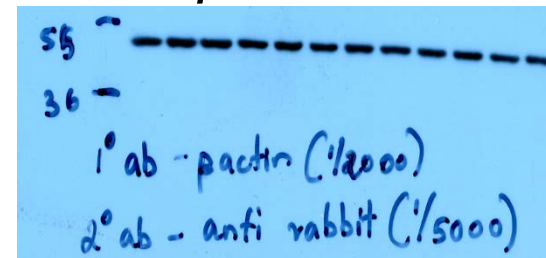



**CUGBP1**

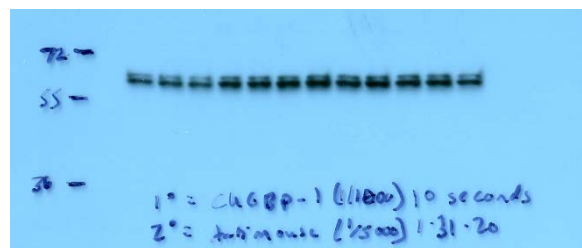

**Rb**

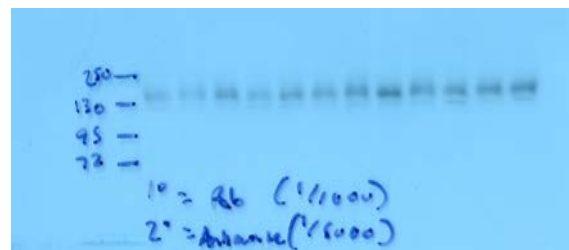

**β-actin**

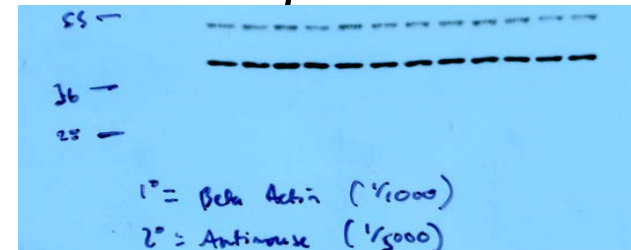

**HNF4α**

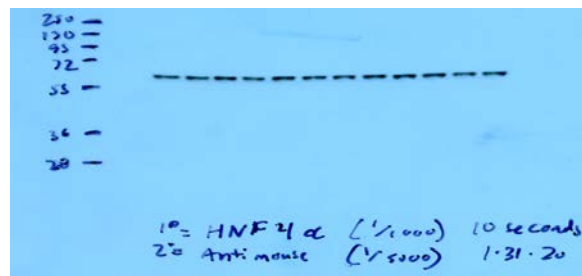

**p53**

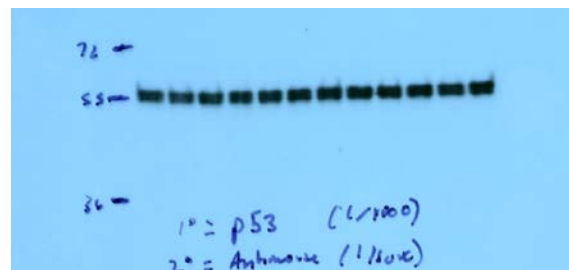

**Ph-Rb**

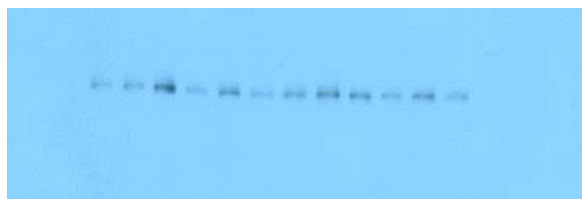

**cdc2**

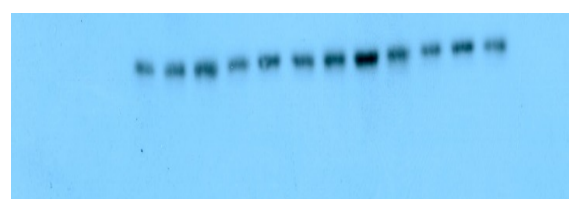

**β-actin**

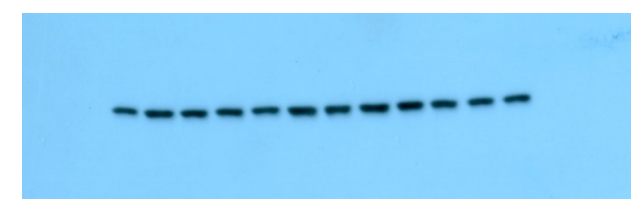

CUGBP1

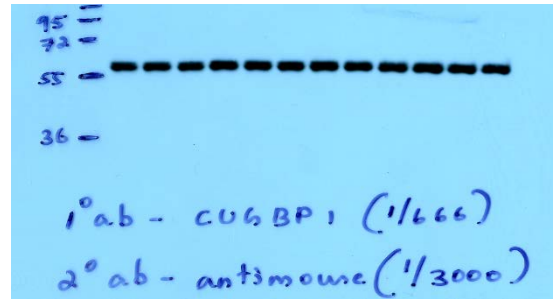

$\beta$ -actin

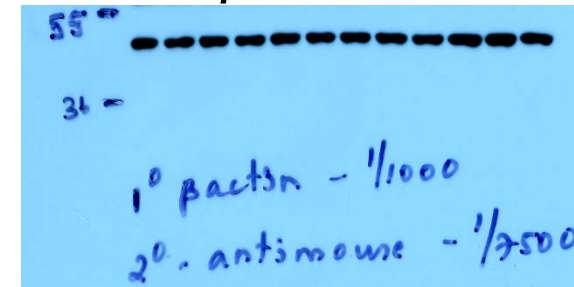

HNF4 $\alpha$

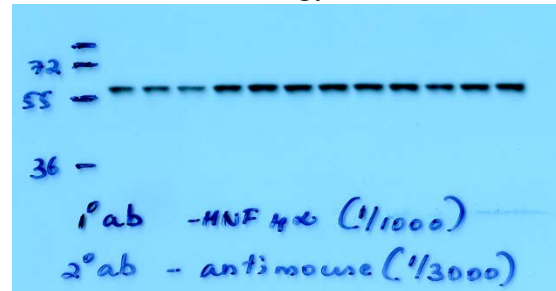

$\beta$ -actin

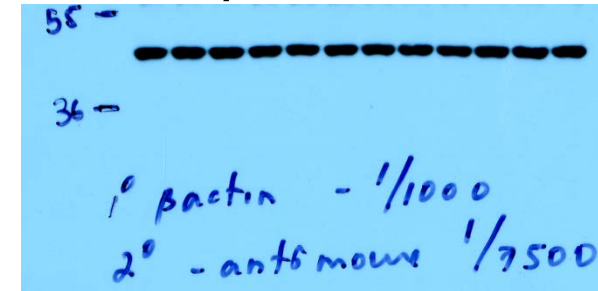

Rb

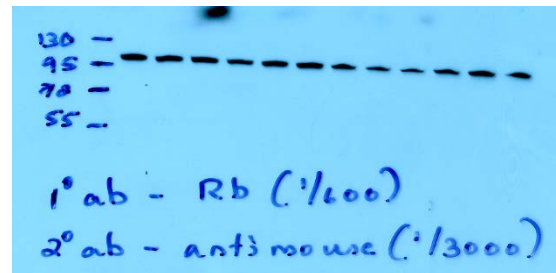

$\beta$ -actin

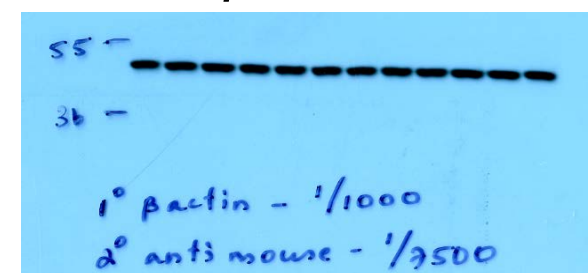

Ph-Rb

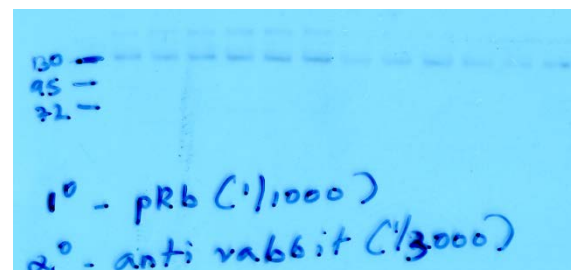

cdc2

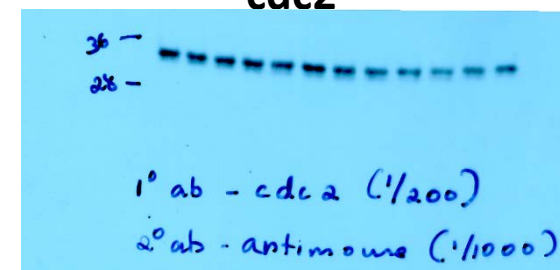

$\beta$ -actin

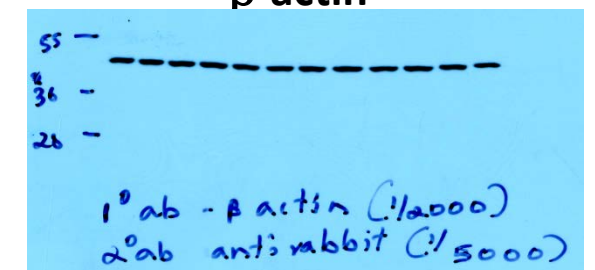

Proteasome  $\alpha$  CYTO

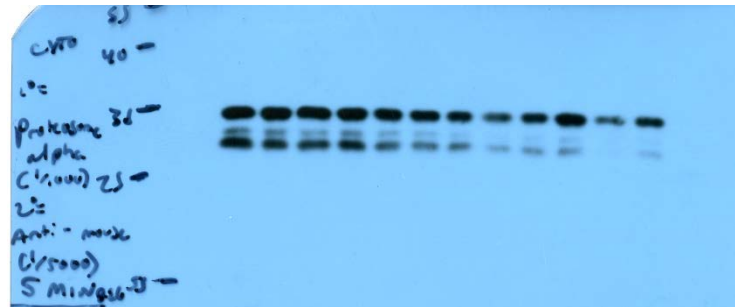

Proteasome  $\alpha$  NUC

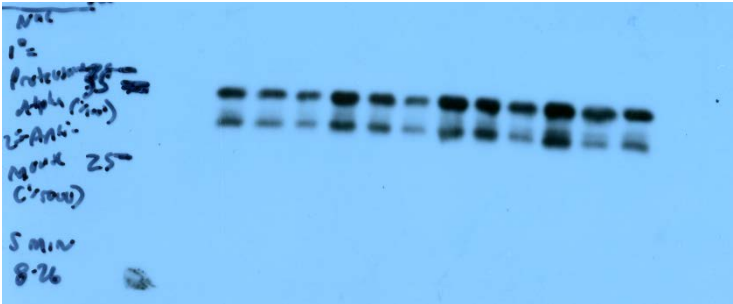

$\beta$ -Actin

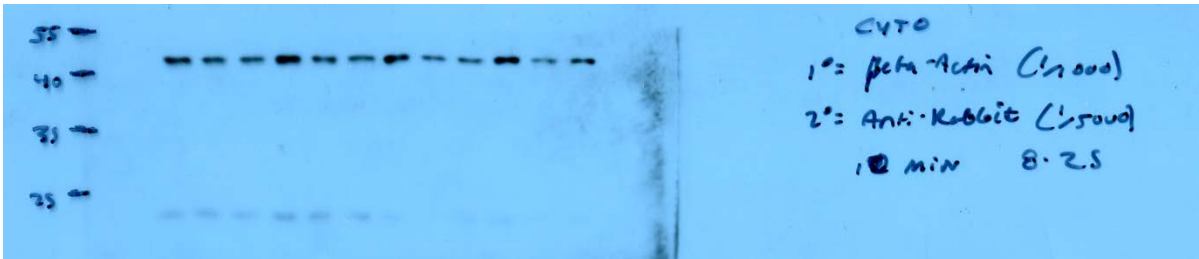

HDAC

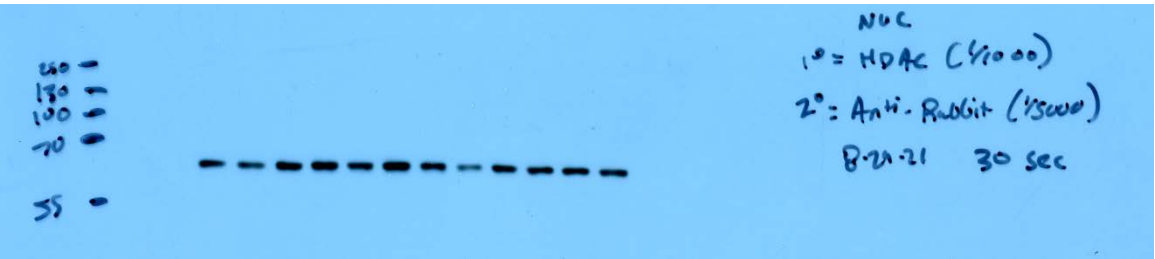

Proteasome  $\alpha$  CYTO

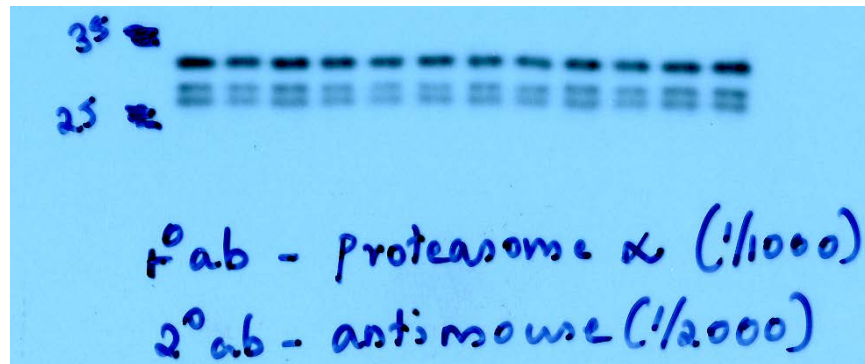

Proteasome  $\alpha$  NUC

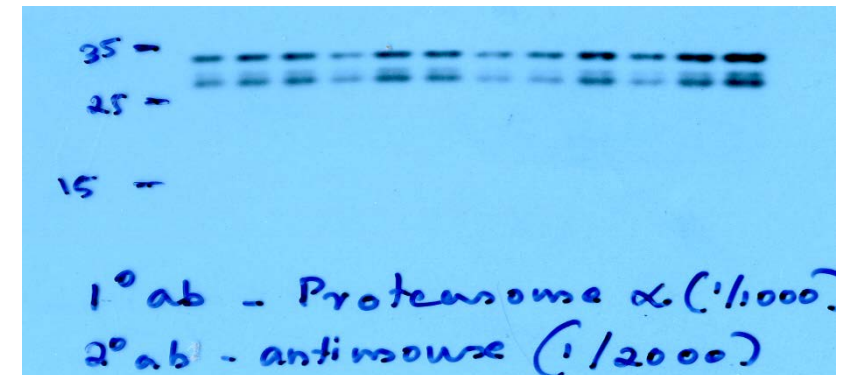

$\beta$ -Actin

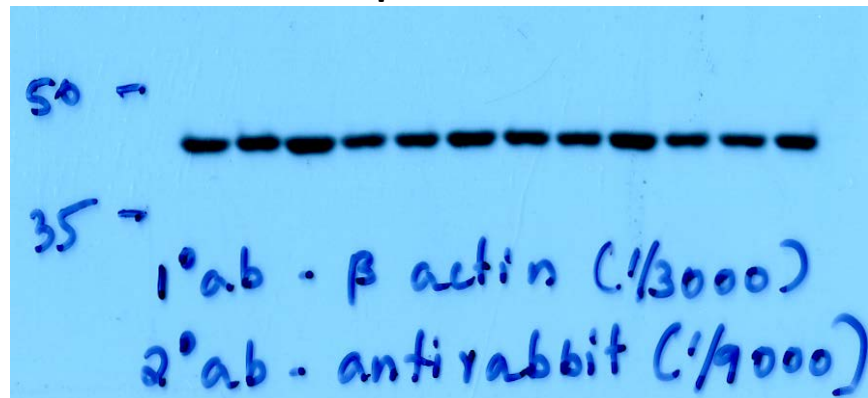

HDAC

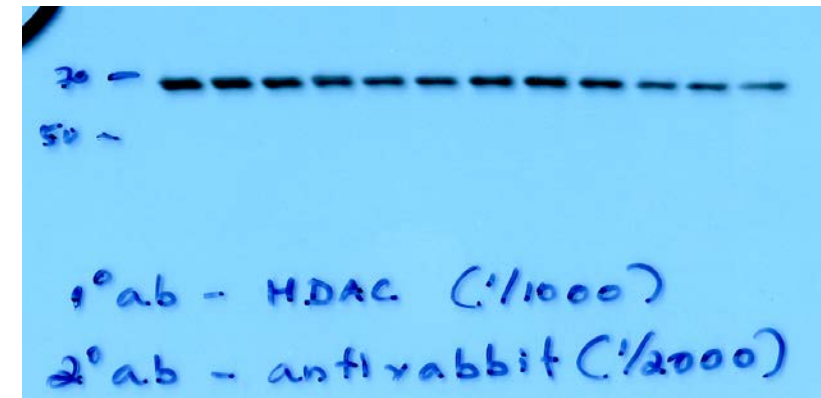

Supplement: s1 [file s1]
